# Supplementary material for: Long-Term Fertilization and Lime-Induced Soil pH Changes Affect Nitrogen Use Efficiency and Grain Yields in Acidic Soil under Wheat-Maize Rotation
Source: MDPI journal article supplement (doi:10.3390/agronomy11102069), 2021-10-15
Supplement: s1 [file s1]

Archive with 2 entries (2 files):
- Figure S1.pdf
- Figure S2.pdf
