# Supplementary material for: Long-Term Fertilization and Lime-Induced Soil pH Changes Affect Nitrogen Use Efficiency and Grain Yields in Acidic Soil under Wheat-Maize Rotation
Source: MDPI journal article supplement (doi:10.3390/agronomy11102069), 2021-10-15
Supplement: s1 [file s1 › Figure S1.pdf]

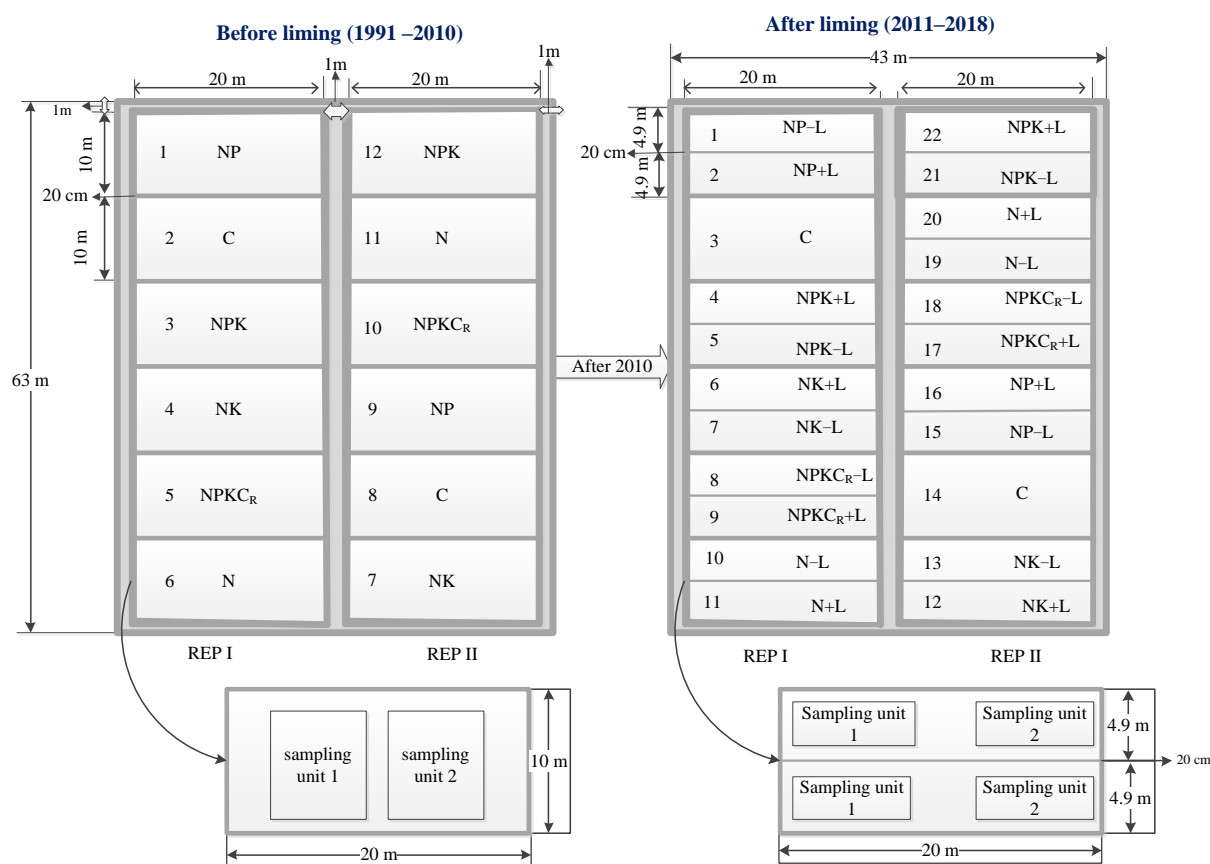

**Figure S1. Experimental layout and design**

## General remarks

**Crop:** Wheat-maize rotation system

**Design:**

- Before liming (1991–2021):** RCBD
- After liming (2011–2018):** Split plot design

**Replication:** Two replications each with 2 strata / a plot

**Sampling unit 1** = stratum 1

**Sampling unit 2** = stratum 2

**Number of rows:**

- Before liming:** Wheat = 50  
Maize = 14
- After liming:** Wheat = 24  
Maize = 6

**Row length:** 20 m

**Space b/n rows:**

Wheat = 20 cm  
Maize = 75 cm

**Space b/n crop:**

Wheat: drilled  
Maize: 25 cm

**Space b/n blocks:** 1m

## Plot size:

- Before liming:** 10 m x 20 m = 200 m<sup>2</sup>  
stratum /sampling unit = 8.25 m x 7.75 m = 64 m<sup>2</sup>
- After liming:** 4.9 m x 20 m = 98 m<sup>2</sup>  
stratum /sampling unit = 4.25 m x 7.5 m = 31.87 m<sup>2</sup>

## Treatments:

- Before liming:** 6 (5 fertilizer treatments + 1 control): C (no fertilizer application or control); (2) N (nitrogen); (3) NP (N and phosphorus); (4) NK (N and potassium); (5) NPK (N, P, and K); (6) NPKC<sub>R</sub> (NPK fertilizer plus crop residue (C<sub>R</sub>))

**After liming:** 11 (5 fertilizer treatments by two level of liming (no liming (-L) and with liming (+L)): (1) C; (2) N-L; (3) N+L; (4) NP-L; (5) NP+L; (6) NK-L; (7) NK+L; (8) NPK-L; (9) NPK+L; (10) NPKC<sub>R</sub>-L; (11) NPKC<sub>R</sub>+L.

**Note:** The stratification technique used for sampling was based on the principle that sampling units from the same stratum/sampling unit are more similar than those from different strata, according to [45].
