# Supplementary material for: Long-Term Fertilization and Lime-Induced Soil pH Changes Affect Nitrogen Use Efficiency and Grain Yields in Acidic Soil under Wheat-Maize Rotation
Source: MDPI journal article supplement (doi:10.3390/agronomy11102069), 2021-10-15
Supplement: s1 [file s1 › Figure S2.pdf]

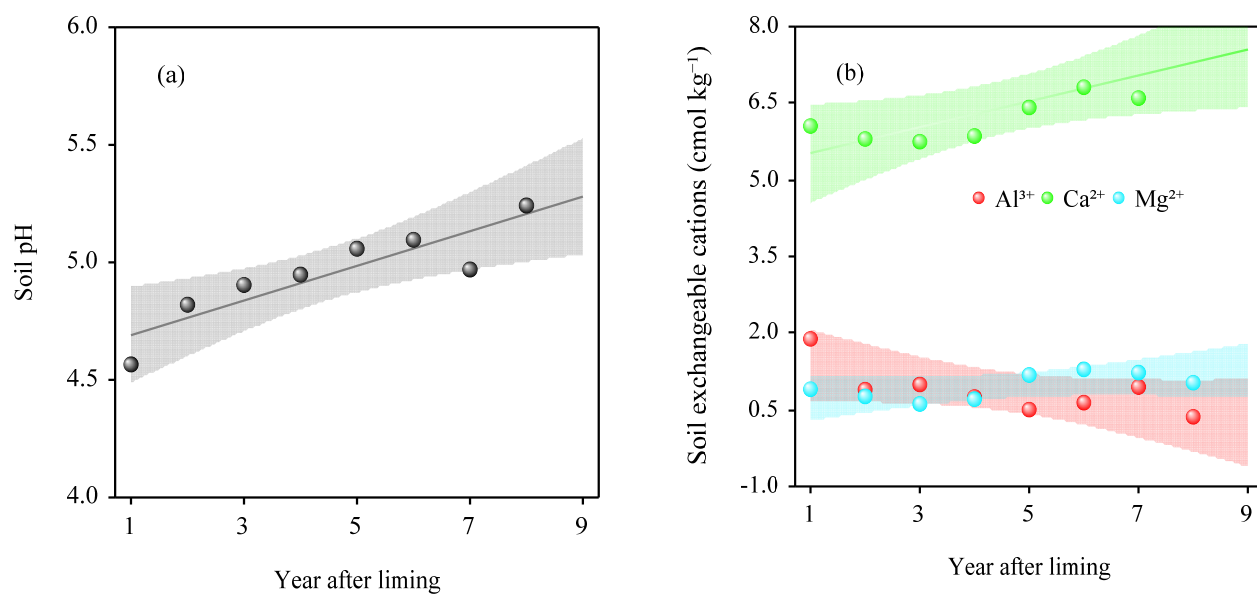

**Figure S2. (a)** Relationship between year after liming and soil pH (soil pH =  $0.07x + 4.62$ ,  $r^2 = 0.79$ ); and **(b)** soil exchangeable cations ( $\text{Al}^{3+} = -0.14x + 1.50$ ,  $r^2 = 0.54$ ;  $\text{Ca}^{2+} = 0.26x + 5.26$ ,  $r^2 = 0.68$ ; and  $\text{Mg}^{2+} = 0.07x + 0.66$ ,  $r^2 = 0.42$ ). The soil sampling depth was 0–20 cm.
